# Supplementary material for: Development of a Novel Algorithm to Identify People with High Likelihood of Adult Growth Hormone Deficiency in a US Healthcare Claims Database
Source: Hindawi journal article supplement (doi:10.1155/2022/7853786), 2022-06-18
Supplement: f1 [file 7853786.f1.zip]

## Supplementary Material 1

**Table S1.** Diagnoses belonging to groups A and B considered by the algorithm.

| Group | ICD version | Diagnosis name                                                            | Diagnosis code |
|-------|-------------|---------------------------------------------------------------------------|----------------|
| A     | ICD10CM     | Multifocal and multisystemic (disseminated) Langerhans-cell histiocytosis | C96.0          |
| A     | ICD10CM     | Hypopituitarism                                                           | E23.0          |
| A     | ICD10CM     | Septo-optic dysplasia                                                     | Q04.4          |
| A     | ICD10CM     | Cleft hard palate                                                         | Q35.1          |
| A     | ICD10CM     | Cleft soft palate                                                         | Q35.3          |
| A     | ICD10CM     | Cleft hard palate with cleft soft palate                                  | Q35.5          |
| A     | ICD10CM     | Cleft uvula                                                               | Q35.7          |
| A     | ICD10CM     | Cleft palate, unspecified                                                 | Q35.9          |
| A     | ICD10CM     | Cleft lip, bilateral                                                      | Q36.0          |
| A     | ICD10CM     | Cleft lip, median                                                         | Q36.1          |
| A     | ICD10CM     | Cleft lip, unilateral                                                     | Q36.9          |
| A     | ICD10CM     | Cleft hard palate with bilateral cleft lip                                | Q37.0          |
| A     | ICD10CM     | Cleft hard palate with unilateral cleft lip                               | Q37.1          |
| A     | ICD10CM     | Cleft soft palate with bilateral cleft lip                                | Q37.2          |
| A     | ICD10CM     | Cleft soft palate with unilateral cleft lip                               | Q37.3          |
| A     | ICD10CM     | Cleft hard and soft palate with bilateral cleft lip                       | Q37.4          |
| A     | ICD10CM     | Cleft hard and soft palate with unilateral cleft lip                      | Q37.5          |
| A     | ICD10CM     | Unspecified cleft palate with bilateral cleft lip                         | Q37.8          |
| A     | ICD10CM     | Unspecified cleft palate with unilateral cleft lip                        | Q37.9          |
| A     | ICD10CM     | Malignant neoplasm of pineal gland                                        | C75.3          |
| A     | ICD10CM     | Benign neoplasm of pineal gland                                           | D35.4          |
| A     | ICD10CM     | Neoplasm of uncertain behavior of pineal gland                            | D44.5          |

|   |         |                                                                             |        |
|---|---------|-----------------------------------------------------------------------------|--------|
| A | ICD10CM | Neoplasm of uncertain behavior of craniopharyngeal duct                     | D44.4  |
| A | ICD09CM | Neoplasm of uncertain behavior of pituitary gland and craniopharyngeal duct | 237.0  |
| A | ICD09CM | Letterer-Siwe disease, unspecified site, extranodal and solid organ sites   | 202.50 |
| A | ICD09CM | Pituitary dwarfism                                                          | 253.3  |
| A | ICD09CM | Panhypopituitarism                                                          | 253.2  |
| A | ICD09CM | Other specified congenital anomalies of brain                               | 742.4  |
| A | ICD09CM | Cleft palate, unspecified                                                   | 749.00 |
| A | ICD09CM | Cleft palate, unilateral, incomplete                                        | 749.02 |
| A | ICD09CM | Cleft lip, unspecified                                                      | 749.10 |
| A | ICD09CM | Cleft lip, unilateral, complete                                             | 749.11 |
| A | ICD09CM | Cleft lip, unilateral, incomplete                                           | 749.12 |
| A | ICD09CM | Cleft lip, bilateral, complete                                              | 749.13 |
| A | ICD09CM | Cleft lip, bilateral, incomplete                                            | 749.14 |
| A | ICD09CM | Cleft palate with cleft lip, unspecified                                    | 749.20 |
| A | ICD09CM | Cleft palate with cleft lip, unilateral, complete                           | 749.21 |
| A | ICD09CM | Cleft palate with cleft lip, unilateral, incomplete                         | 749.22 |
| A | ICD09CM | Cleft palate with cleft lip, bilateral, complete                            | 749.23 |
| A | ICD09CM | Cleft palate with cleft lip, bilateral, incomplete                          | 749.24 |
| A | ICD09CM | Personal history of irradiation, presenting hazards to health               | V15.3  |
| A | ICD09CM | Malignant neoplasm of pineal gland                                          | 194.4  |
| A | ICD09CM | Benign neoplasm of pineal gland                                             | 227.4  |
| A | ICD09CM | Neoplasm of uncertain behavior of pineal gland                              | 237.1  |
| B | ICD10CM | Drug-induced hypopituitarism                                                | E23.1  |
| B | ICD10CM | Hypothalamic dysfunction, not elsewhere classified                          | E23.3  |
| B | ICD10CM | Other disorders of pituitary gland                                          | E23.6  |
| B | ICD10CM | Disorder of pituitary gland, unspecified                                    | E23.7  |

|   |         |                                                                                       |       |
|---|---------|---------------------------------------------------------------------------------------|-------|
| B | ICD10CM | Postprocedural hypopituitarism                                                        | E89.3 |
| B | ICD10CM | Iatrogenic pituitary disorders                                                        | 253.7 |
| B | ICD09CM | Unspecified disorder of the pituitary gland and its hypothalamic control              | 253.9 |
| B | ICD09CM | Other anterior pituitary disorders                                                    | 253.4 |
| B | ICD09CM | Other disorders of the pituitary and other syndromes of diencephalohypophyseal origin | 253.8 |

---

ICD, International Classification of Diseases; ICD09CM, International Classification of Diseases, Ninth Revision, Clinical Modification; ICD10CM, International Classification of Diseases, Tenth Revision, Clinical Modification.

**Table S2.** Diagnoses of pituitary hormone deficiencies other than AGHD considered by the algorithm.

| ICD version | Diagnosis name                              | Diagnosis code |
|-------------|---------------------------------------------|----------------|
| ICD10CM     | Diabetes insipidus                          | E23.2          |
| ICD10CM     | Secondary amenorrhea                        | N91.1          |
| ICD10CM     | Secondary oligomenorrhea                    | N91.4          |
| ICD10CM     | Benign neoplasm of pituitary gland          | D35.2          |
| ICD10CM     | Galactorrhea not associated with childbirth | N64.3          |
| ICD10CM     | Unspecified adrenocortical insufficiency    | E27.40         |
| ICD09CM     | Diabetes insipidus                          | 253.5          |
| ICD09CM     | Benign neoplasm of pituitary gland          | 227.3          |
| ICD09CM     | Glucocorticoid deficiency                   | 255.41         |

AGHD, adult growth hormone deficiency; ICD, International Classification of Diseases; ICD09CM, International Classification of Diseases, Ninth Revision, Clinical Modification; ICD10CM, International Classification of Diseases, Tenth Revision, Clinical Modification.

**Table S3.** Growth hormone treatments considered by the algorithm.

| ATC code | ATC name   |
|----------|------------|
| H01AC01  | Somatropin |
| H01AC02  | Somatrem   |

ATC, anatomical therapeutic chemical.

**Table S4.** Diagnoses considered by the algorithm – exclusion list 1.

| ICD version | Diagnosis name                          | Diagnosis code |
|-------------|-----------------------------------------|----------------|
| ICD10CM     | Acromegaly and pituitary gigantism      | E22.0          |
| ICD10CM     | Pituitary-dependent Cushing disease     | E24.0          |
| ICD10CM     | Drug-induced Cushing syndrome           | E24.2          |
| ICD10CM     | Ectopic ACTH syndrome                   | E24.3          |
| ICD10CM     | Alcohol-induced pseudo-Cushing syndrome | E24.4          |
| ICD10CM     | Other Cushing syndrome                  | E24.8          |
| ICD10CM     | Cushing syndrome, unspecified           | E24.9          |
| ICD09CM     | Acromegaly and gigantism                | 253.0          |
| ICD09CM     | Cushing syndrome                        | 255.0          |

ACTH, adrenocorticotrophic hormone; ICD, International Classification of Diseases; ICD09CM, International Classification of Diseases, Ninth Revision, Clinical Modification; ICD10CM, International Classification of Diseases, Tenth Revision, Clinical Modification.

**Table S5.** Diagnoses considered by the algorithm – exclusion list 2.

| <b>ICD version</b> | <b>Diagnosis name</b>                                         | <b>Diagnosis code(s)</b> |
|--------------------|---------------------------------------------------------------|--------------------------|
| ICD10CM            | Dermatitis and eczema                                         | L20–L30                  |
| ICD10CM            | Lichen planus                                                 | L43                      |
| ICD10CM            | Bullous pemphigoid                                            | L12.0                    |
| ICD10CM            | Inflammatory polyarthropathies                                | M05–M14                  |
| ICD10CM            | Psoriasis                                                     | L40                      |
| ICD10CM            | Noninfective enteritis and colitis                            | K50-52                   |
| ICD10CM            | Primary adrenocortical insufficiency                          | E27.1                    |
| ICD10CM            | Autoimmune hepatitis                                          | K75.4                    |
| ICD10CM            | Adrenogenital disorder, unspecified                           | E25.9                    |
| ICD10CM            | Other hypothyroidism                                          | E03                      |
| ICD10CM            | Atrophy of vulva                                              | N90.5                    |
| ICD09CM            | Other inflammatory conditions of skin and subcutaneous tissue | 690–698                  |
| ICD09CM            | Lichen planus                                                 | 697.0                    |
| ICD09CM            | Pemphigoid                                                    | 694.5                    |
| ICD09CM            | Arthropathies and related disorders                           | 710–719                  |
| ICD09CM            | Other psoriasis                                               | 696.1                    |
| ICD09CM            | Autoimmune hepatitis                                          | 571.42                   |
| ICD09CM            | Adrenogenital disorders                                       | 255.2                    |
| ICD09CM            | Congenital hypothyroidism                                     | 243                      |
| ICD09CM            | Atrophy of vulva                                              | 624.1                    |

ICD, International Classification of Diseases; ICD09CM, International Classification of Diseases, Ninth Revision, Clinical Modification; ICD10CM, International Classification of Diseases, Tenth Revision, Clinical Modification.

**Table S6.** Treatment with pituitary hormones (other than growth hormone) considered by the algorithm.

| <b>Group</b> | <b>ATC code</b> | <b>ATC name</b>                  |
|--------------|-----------------|----------------------------------|
| Sex hormones | G03B            | Androgens                        |
| Sex hormones | G03C            | Estrogens                        |
| Sex hormones | G03D            | Progesterone                     |
| ACTH         | H02             | Corticosteroids for systemic use |
| Thyroxine    | H03A            | Thyroid preparations             |

Only people with  $\geq 2$  prescriptions from  $\geq 2$  different groups within 1 year were considered by the algorithm.

ACTH, adrenocorticotrophic hormone; ATC, anatomical therapeutic chemical.



**Table S7.** Diagnostic tests for GHD considered by the algorithm.

| Test type   | Test name                          | CPT code |
|-------------|------------------------------------|----------|
| Stimulation | Insulin tolerance test             | 80435    |
| Stimulation | Glucagon stimulation test          | 82943    |
| Stimulation | Arginine/levodopa stimulation test | 80428    |
| Laboratory  | Growth hormone serum level         | 83003    |
| Laboratory  | IGF-I serum level                  | 84305    |

CPT, current procedural terminology; GHD, growth hormone deficiency; IGF-I, insulin-like growth factor-I.

**Table S8.** Tests for pituitary hormones deficiencies other than growth hormone considered by the algorithm.

| Group       | Test name                              | Hormone measured                                              | CPT code |
|-------------|----------------------------------------|---------------------------------------------------------------|----------|
| Sex hormone | LH                                     | LH                                                            | 83002    |
| Sex hormone | FSH                                    | FSH                                                           | 83001    |
| Sex hormone | LH/FSH                                 | Gonadotropin panel                                            | 80426    |
| ACTH        | ACTH                                   | ACTH                                                          | 82024    |
| ACTH        | ACTH with cortisol                     | ACTH stim panel                                               | 80400    |
|             |                                        |                                                               | 82533    |
| TSH         | TSH                                    | TSH                                                           | 84443    |
| Combined    | Combined anterior pituitary panel      | ACTH, TSH, cortisol, LH, FSH, prolactin, human growth hormone | 80418    |
| Sex hormone | Testosterone (done with LH/FSH) in men | Testosterone                                                  | 80414    |
|             |                                        |                                                               | 84403    |
| Sex hormone | Estradiol (done with LH/FSH) in women  | Estradiol                                                     | 80415    |
|             |                                        |                                                               | 82670    |
| Sex hormone | Free testosterone                      | Testosterone                                                  | 84402    |
| Sex hormone | Bioactive testosterone                 | Testosterone                                                  | 84410    |
| TSH         | Free T4                                | T4                                                            | 84439    |
| Sex hormone | Prolactin                              | Prolactin                                                     | 84146    |

ACTH, adrenocorticotrophic hormone; CPT, current procedural terminology; FSH, follicle-stimulating hormone; LH, luteinizing hormone; T4, thyroxine; TSH, thyroid-stimulating hormone.
