# Supplementary material for: Development of a Novel Algorithm to Identify People with High Likelihood of Adult Growth Hormone Deficiency in a US Healthcare Claims Database
Source: Hindawi journal article supplement (doi:10.1155/2022/7853786), 2022-06-18
Supplement: f1 [file 7853786.f1.zip]

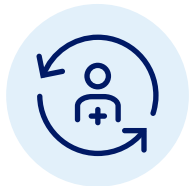

# What is AGHD?

A rare endocrine disorder, characterized by the deficiency of GH that can persist from childhood into adulthood or be newly acquired in adulthood<sup>1,2</sup>

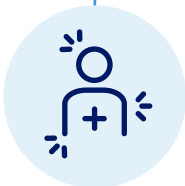

Clinical effects include abnormal body composition, impaired cognitive function, and reduced QoL<sup>3,4</sup>

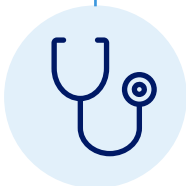

Identifying adults likely to have AGHD for diagnostic referral can be challenging, as there is no single biomarker and many clinical features resemble aspects of normal aging<sup>5</sup>

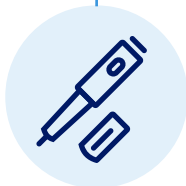

Recombinant human GH therapy has been consistently demonstrated as beneficial for the treatment of AGHD, with low risks<sup>1</sup>

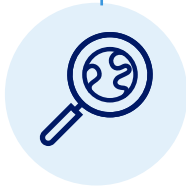

There is limited epidemiological information on the prevalence within a large US population

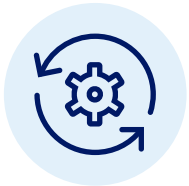

# Iterative algorithm development process

Clinical guidelines<sup>6-8</sup>

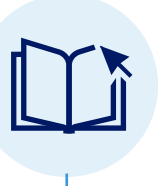

Draft algorithm

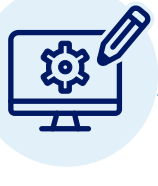

Testing

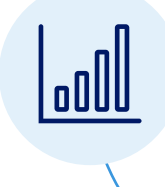

Revision

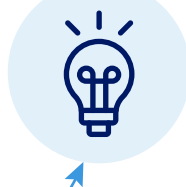

Expert clinical input

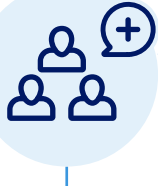

Final algorithm to categorize people by their likelihood of having AGHD

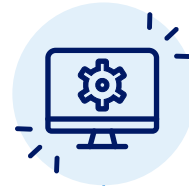

# Application of the final algorithm to an administrative healthcare database

135

million people from the US

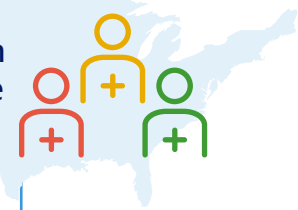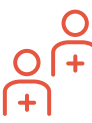

0.5%

high likelihood of AGHD

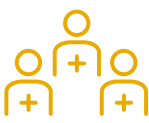

6.0%

moderate likelihood of AGHD

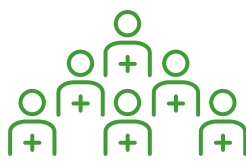

93.6%

low likelihood of AGHD

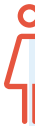

59.3% female

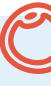

32.6% hyperlipidemia

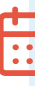

58.3% ≥50 years old

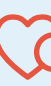

31.4% hypertension

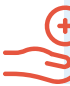

2.2% GH therapy as adults

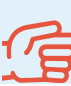

14.1% Impaired glucose tolerance/diabetes\*

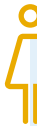

71.6% female

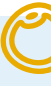

28.8% hyperlipidemia

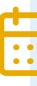

49.0% ≥50 years old

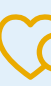

25.9% hypertension

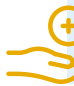

0.0% GH therapy as adults

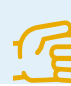

11.8% Impaired glucose tolerance/diabetes\*

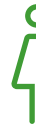

50.4% female

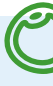

27.8% hyperlipidemia

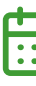

37.6% ≥50 years old

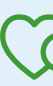

14.6% hypertension

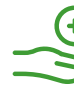

0.0% GH therapy as adults

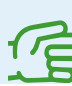

5.7% Impaired glucose tolerance/diabetes\*

\*diabetes mellitus  
AGHD, adult growth hormone deficiency; GH, growth hormone; QoL, quality of life  
Date of preparation: May 2021. Novo Nordisk Health Care AG, Zurich, Switzerland.

References 1. Yuen *et al. Endroc Pract* 2019;25:1191–232; 2. Molitch *et al. J Clin Endocrinol Metab* 2011;96:1587–609; 3. Melmed. *N Engl J Med* 2019;380:2551–62; 4. Gupta. *Indian J Endocrinol Metab* 2011;15 Suppl 3: S197–S202; 5. Reed *et al. Front Endocrinol* 2013;4:64; 6. Boguszewski. *Rev Argent Endocrinol Metab* 2010;47:30–8; 7. Giustina *et al. J Endocrinol Invest* 2008;31:820–38; 8. Ho. *Eur J Endocrinol* 2007;157:695–700.
