# Supplementary material for: Development of a Novel Algorithm to Identify People with High Likelihood of Adult Growth Hormone Deficiency in a US Healthcare Claims Database
Source: Int J Endocrinol. 2022 Jun 18;2022:7853786. doi: 10.1155/2022/7853786 (PMC9233577; doi:10.1155/2022/7853786)
Supplement: Supplementary Materials — Table S1. Diagnoses belonging to groups A and B considered by the algorithm. Table S2. Diagnoses of pituitary hormone deficiencies other than AGHD considered by the algorithm. Table S3. Growth hormone treatments considered by the algorithm. Table S4. Diagnoses considered by the algorithm—exclusion list 1. Table S5. Diagnoses considered by the algorithm—exclusion list 2. Table S6. Treatment with pituitary hormones (other than growth hormone) considered by the algorithm. Table S7. Diagnostic tests for GHD considered by the algorithm. Table S8. Tests for pituitary hormone deficiencies other than growth hormone considered by the algorithm. [file 7853786.f1.zip]

Archive with 2 entries (2 files):
- Supplementary Material 1_pdf.pdf
- Supplementary Material 2_infographic pdf.pdf
